# Supplementary material for: The Utility of Contrast-Enhanced Magnetic Resonance Imaging in Uterine Cervical Cancer: A Systematic Review
Source: MDPI journal article supplement (doi:10.3390/life13061368), 2023-06-12
Supplement: s1 [file s1]

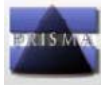

## PRISMA 2020 Checklist

| Section and Topic             | Item # | Checklist item                                                                                                                                                                                                                                                                                       | Location where item is reported |
|-------------------------------|--------|------------------------------------------------------------------------------------------------------------------------------------------------------------------------------------------------------------------------------------------------------------------------------------------------------|---------------------------------|
| <b>TITLE</b>                  |        |                                                                                                                                                                                                                                                                                                      |                                 |
| Title                         | 1      | Identify the report as a systematic review.                                                                                                                                                                                                                                                          | Page 1                          |
| <b>ABSTRACT</b>               |        |                                                                                                                                                                                                                                                                                                      |                                 |
| Abstract                      | 2      | See the PRISMA 2020 for Abstracts checklist.                                                                                                                                                                                                                                                         | Page 1                          |
| <b>INTRODUCTION</b>           |        |                                                                                                                                                                                                                                                                                                      |                                 |
| Rationale                     | 3      | Describe the rationale for the review in the context of existing knowledge.                                                                                                                                                                                                                          | Page 2                          |
| Objectives                    | 4      | Provide an explicit statement of the objective(s) or question(s) the review addresses.                                                                                                                                                                                                               | Page 2                          |
| <b>METHODS</b>                |        |                                                                                                                                                                                                                                                                                                      |                                 |
| Eligibility criteria          | 5      | Specify the inclusion and exclusion criteria for the review and how studies were grouped for the syntheses.                                                                                                                                                                                          | Page 3                          |
| Information sources           | 6      | Specify all databases, registers, websites, organisations, reference lists and other sources searched or consulted to identify studies. Specify the date when each source was last searched or consulted.                                                                                            | Page 3                          |
| Search strategy               | 7      | Present the full search strategies for all databases, registers and websites, including any filters and limits used.                                                                                                                                                                                 | Page 3                          |
| Selection process             | 8      | Specify the methods used to decide whether a study met the inclusion criteria of the review, including how many reviewers screened each record and each report retrieved, whether they worked independently, and if applicable, details of automation tools used in the process.                     | Page 3                          |
| Data collection process       | 9      | Specify the methods used to collect data from reports, including how many reviewers collected data from each report, whether they worked independently, any processes for obtaining or confirming data from study investigators, and if applicable, details of automation tools used in the process. | Page 3                          |
| Data items                    | 10a    | List and define all outcomes for which data were sought. Specify whether all results that were compatible with each outcome domain in each study were sought (e.g. for all measures, time points, analyses), and if not, the methods used to decide which results to collect.                        | Page 4                          |
|                               | 10b    | List and define all other variables for which data were sought (e.g. participant and intervention characteristics, funding sources). Describe any assumptions made about any missing or unclear information.                                                                                         | Page 4                          |
| Study risk of bias assessment | 11     | Specify the methods used to assess risk of bias in the included studies, including details of the tool(s) used, how many reviewers assessed each study and whether they worked independently, and if applicable, details of automation tools used in the process.                                    | Page 3                          |
| Effect measures               | 12     | Specify for each outcome the effect measure(s) (e.g. risk ratio, mean difference) used in the synthesis or presentation of results.                                                                                                                                                                  | Pages 3-4                       |
| Synthesis methods             | 13a    | Describe the processes used to decide which studies were eligible for each synthesis (e.g. tabulating the study intervention characteristics and comparing against the planned groups for each synthesis (item #5)).                                                                                 | Pages 3-4                       |
|                               | 13b    | Describe any methods required to prepare the data for presentation or synthesis, such as handling of missing summary statistics, or data conversions.                                                                                                                                                | Pages 3-4                       |
|                               | 13c    | Describe any methods used to tabulate or visually display results of individual studies and syntheses.                                                                                                                                                                                               | Pages 3-4                       |
|                               | 13d    | Describe any methods used to synthesize results and provide a rationale for the choice(s). If meta-analysis was performed, describe the model(s), method(s) to identify the presence and extent of statistical heterogeneity, and software package(s) used.                                          | Pages 3-4                       |
|                               | 13e    | Describe any methods used to explore possible causes of heterogeneity among study results (e.g. subgroup analysis, meta-regression).                                                                                                                                                                 | Pages 3-4                       |
|                               | 13f    | Describe any sensitivity analyses conducted to assess robustness of the synthesized results.                                                                                                                                                                                                         | Pages 3-4                       |
| Reporting bias assessment     | 14     | Describe any methods used to assess risk of bias due to missing results in a synthesis (arising from reporting biases).                                                                                                                                                                              | Pages 3-4                       |
| Certainty assessment          | 15     | Describe any methods used to assess certainty (or confidence) in the body of evidence for an outcome.                                                                                                                                                                                                | Pages 3-4                       |



## PRISMA 2020 Checklist

| Section and Topic                              | Item # | Checklist item                                                                                                                                                                                                                                                                       | Location where item is reported |
|------------------------------------------------|--------|--------------------------------------------------------------------------------------------------------------------------------------------------------------------------------------------------------------------------------------------------------------------------------------|---------------------------------|
| <b>RESULTS</b>                                 |        |                                                                                                                                                                                                                                                                                      |                                 |
| Study selection                                | 16a    | Describe the results of the search and selection process, from the number of records identified in the search to the number of studies included in the review, ideally using a flow diagram.                                                                                         | Page 4                          |
|                                                | 16b    | Cite studies that might appear to meet the inclusion criteria, but which were excluded, and explain why they were excluded.                                                                                                                                                          | Page 4                          |
| Study characteristics                          | 17     | Cite each included study and present its characteristics.                                                                                                                                                                                                                            | Table S2                        |
| Risk of bias in studies                        | 18     | Present assessments of risk of bias for each included study.                                                                                                                                                                                                                         | Page 5                          |
| Results of individual studies                  | 19     | For all outcomes, present, for each study: (a) summary statistics for each group (where appropriate) and (b) an effect estimate and its precision (e.g. confidence/credible interval), ideally using structured tables or plots.                                                     | Pages 6-9                       |
| Results of syntheses                           | 20a    | For each synthesis, briefly summarise the characteristics and risk of bias among contributing studies.                                                                                                                                                                               | Pages 6-9                       |
|                                                | 20b    | Present results of all statistical syntheses conducted. If meta-analysis was done, present for each the summary estimate and its precision (e.g. confidence/credible interval) and measures of statistical heterogeneity. If comparing groups, describe the direction of the effect. | Pages 6-9                       |
|                                                | 20c    | Present results of all investigations of possible causes of heterogeneity among study results.                                                                                                                                                                                       | Pages 6-9                       |
|                                                | 20d    | Present results of all sensitivity analyses conducted to assess the robustness of the synthesized results.                                                                                                                                                                           | Pages 6-9                       |
| Reporting biases                               | 21     | Present assessments of risk of bias due to missing results (arising from reporting biases) for each synthesis assessed.                                                                                                                                                              | Page 5                          |
| Certainty of evidence                          | 22     | Present assessments of certainty (or confidence) in the body of evidence for each outcome assessed.                                                                                                                                                                                  |                                 |
| <b>DISCUSSION</b>                              |        |                                                                                                                                                                                                                                                                                      |                                 |
| Discussion                                     | 23a    | Provide a general interpretation of the results in the context of other evidence.                                                                                                                                                                                                    | Pages 6-10                      |
|                                                | 23b    | Discuss any limitations of the evidence included in the review.                                                                                                                                                                                                                      | Pages 6-10                      |
|                                                | 23c    | Discuss any limitations of the review processes used.                                                                                                                                                                                                                                | Pages 6-10                      |
|                                                | 23d    | Discuss implications of the results for practice, policy, and future research.                                                                                                                                                                                                       | Page 10                         |
| <b>OTHER INFORMATION</b>                       |        |                                                                                                                                                                                                                                                                                      |                                 |
| Registration and protocol                      | 24a    | Provide registration information for the review, including register name and registration number, or state that the review was not registered.                                                                                                                                       | Page 3                          |
|                                                | 24b    | Indicate where the review protocol can be accessed, or state that a protocol was not prepared.                                                                                                                                                                                       | Page 3                          |
|                                                | 24c    | Describe and explain any amendments to information provided at registration or in the protocol.                                                                                                                                                                                      | Page 3                          |
| Support                                        | 25     | Describe sources of financial or non-financial support for the review, and the role of the funders or sponsors in the review.                                                                                                                                                        | Page 10                         |
| Competing interests                            | 26     | Declare any competing interests of review authors.                                                                                                                                                                                                                                   | Page 10                         |
| Availability of data, code and other materials | 27     | Report which of the following are publicly available and where they can be found: template data collection forms; data extracted from included studies; data used for all analyses; analytic code; any other materials used in the review.                                           | Page 10                         |

From: Page MJ, McKenzie JE, Bossuyt PM, Boutron I, Hoffmann TC, Mulrow CD, et al. The PRISMA 2020 statement: an updated guideline for reporting systematic reviews. BMJ 2021;372:n71. doi: 10.1136/bmj.n71

For more information, visit: <http://www.prisma-statement.org/>

| Authors           | Date | Title                                                                                                                                                                           | DOI                                                                                                                                                           |
|-------------------|------|---------------------------------------------------------------------------------------------------------------------------------------------------------------------------------|---------------------------------------------------------------------------------------------------------------------------------------------------------------|
| Hricak et al      | 1991 | Carcinoma of the uterus: use of gadopentetate dimeglumine in MR imaging                                                                                                         | <a href="https://doi.org/10.1148/radiology.181.1.1887062">10.1148/radiology.181.1.1887062</a>                                                                 |
| Thurnher et al    | 1992 | MR imaging of pelvic masses in women: contrast-enhanced vs unenhanced images                                                                                                    | <a href="https://doi.org/10.2214/ajr.159.6.1442393">10.2214/ajr.159.6.1442393</a>                                                                             |
| Yamashita et al   | 1992 | Carcinoma of the cervix: dynamic MR imaging                                                                                                                                     | <a href="https://doi.org/10.1148/radiology.182.3.1535875">10.1148/radiology.182.3.1535875</a>                                                                 |
| Hanabayashi et al | 1993 | Enhanced magnetic resonance imaging evaluation for spread of cervical carcinoma                                                                                                 | <a href="https://doi.org/10.1016/0020-7292(93)90519-3">10.1016/0020-7292(93)90519-3</a>                                                                       |
| Sironi et al      | 1993 | Carcinoma of the cervix: value of plain and gadolinium-enhanced MR imaging in assessing degree of invasiveness                                                                  | <a href="https://doi.org/10.1148/radiology.188.3.8351350">10.1148/radiology.188.3.8351350</a>                                                                 |
| Hricak et al      | 1993 | Irradiation of the cervix uteri: value of unenhanced and contrast-enhanced MR imaging                                                                                           | <a href="https://doi.org/10.1148/radiology.189.2.8210364">10.1148/radiology.189.2.8210364</a>                                                                 |
| Hawighorst et al  | 1996 | Cervical carcinoma: comparison of standard and pharmacokinetic MR imaging                                                                                                       | <a href="https://doi.org/10.1148/radiology.201.2.8888254">10.1148/radiology.201.2.8888254</a>                                                                 |
| Seki et al        | 1996 | Stromal invasion by carcinoma of the cervix: assessment with dynamic MR imaging                                                                                                 | <a href="https://doi.org/10.2214/ajr.168.6.9168730">10.2214/ajr.168.6.9168730</a>                                                                             |
| Yamashita et al   | 1996 | Dynamic MR imaging of recurrent postoperative cervical cancer                                                                                                                   | <a href="https://doi.org/10.1002/jmri.1880060130">10.1002/jmri.1880060130</a>                                                                                 |
| Hawighorst        | 1996 | Pelvic lesions in patients with treated cervical carcinoma: efficacy of pharmacokinetic analysis of dynamic MR images in distinguishing recurrent tumors from benign conditions | <a href="https://doi.org/10.2214/ajr.166.2.8553955">10.2214/ajr.166.2.8553955</a>                                                                             |
| Mayr et al        | 1996 | Tumor perfusion studies using fast magnetic resonance imaging technique in advanced cervical cancer: a new noninvasive predictive assay                                         | <a href="https://doi.org/10.1016/s0360-3016(97)85090-0">10.1016/s0360-3016(97)85090-0</a>                                                                     |
| Tsuda et al       | 1997 | MR imaging of cervical carcinoma: comparison among T2-weighted, dynamic, and postcontrast T1-weighted images with histopathological correlation                                 | <a href="https://doi.org/10.1007/s002619900151">10.1007/s002619900151</a>                                                                                     |
| Abe et al         | 1998 | High-resolution turbo spin-echo MR imaging with contrast-enhanced dynamic scanning and T2-weighting                                                                             | <a href="https://doi.org/10.1080/02841859809172203">10.1080/02841859809172203</a>                                                                             |
| Postema et al     | 1998 | Fast dynamic contrast-enhanced colour-coded MRI in uterine cervix carcinoma: useful for tumour staging?                                                                         | <a href="https://doi.org/10.1016/s0009-9260(98)80314-0">10.1016/s0009-9260(98)80314-0</a>                                                                     |
| Scheidler et al   | 1998 | Parametrial invasion in cervical carcinoma: evaluation of detection at MR imaging with fat suppression                                                                          | <a href="https://doi.org/10.1148/radiology.206.1.9423661">10.1148/radiology.206.1.9423661</a>                                                                 |
| Van Vierzen et al | 1998 | Fast dynamic contrast enhanced MR imaging of cervical carcinoma                                                                                                                 | <a href="https://doi.org/10.1016/s0009-9260(98)80098-6">10.1016/s0009-9260(98)80098-6</a>                                                                     |
| Postema et al     | 1999 | Cervical carcinoma: can dynamic contrast-enhanced MR imaging help predict tumor aggressiveness?                                                                                 | <a href="https://doi.org/10.1148/radiology.210.1.r99ja16217">10.1148/radiology.210.1.r99ja16217</a>                                                           |
| Gong et al        | 1999 | Contrast enhanced dynamic MRI of cervical carcinoma during radiotherapy: early prediction of tumour regression rate                                                             | <a href="https://doi.org/10.1259/bjr.72.864.10703475">10.1259/bjr.72.864.10703475</a>                                                                         |
| Mayr et al        | 2000 | Pixel analysis of MR perfusion imaging in predicting radiation therapy outcome in cervical cancer                                                                               | <a href="https://doi.org/10.1002/1522-2586(200012)12:6&lt;1027::aid-jmri31&gt;3.0.co;2-5">10.1002/1522-2586(200012)12:6&lt;1027::aid-jmri31&gt;3.0.co;2-5</a> |
| Boss et al        | 2001 | Post-radiotherapy contrast enhancement changes in fast dynamic MRI of cervical carcinoma                                                                                        | <a href="https://doi.org/10.1002/jmri.1084">10.1002/jmri.1084</a>                                                                                             |
| Sironi et al      | 2002 | Clinical stage I carcinoma of the uterine cervix value of preoperative magnetic resonance imaging in assessing parametrial invasion                                             | <a href="https://doi.org/10.1177/030089160208800410">10.1177/030089160208800410</a>                                                                           |
| Loncaster et al   | 2002 | Prediction of radiotherapy outcome using dynamic contrast enhanced MRI of carcinoma of the cervix                                                                               | <a href="https://doi.org/10.1016/s0360-3016(02)02972-3">10.1016/s0360-3016(02)02972-3</a>                                                                     |
| Dedieu et al      | 2008 | Capillary permeability and extracellular volume fraction in uterine cervical cancer as patient outcome predictors: measurements by using dynamic MRI spin-lattice relaxometry   | <a href="https://doi.org/10.1002/jmri.21324">10.1002/jmri.21324</a>                                                                                           |
| Zahra et al       | 2009 | Semiquantitative and quantitative dynamic contrast-enhanced magnetic resonance imaging measurements predict radiation response in cervix cancer                                 | <a href="https://doi.org/10.1016/j.ijrobp.2008.08.023">10.1016/j.ijrobp.2008.08.023</a>                                                                       |

|                |      |                                                                                                                                                                                                         |                                                                                         |
|----------------|------|---------------------------------------------------------------------------------------------------------------------------------------------------------------------------------------------------------|-----------------------------------------------------------------------------------------|
| Semple et al   | 2009 | A combined pharmacokinetic and radiologic assessment of dynamic contrast-enhanced magnetic resonance imaging predicts response to chemoradiation in locally advanced cervical cancer                    | <a href="https://doi.org/10.1016/j.ijrobp.2009.04.069">10.1016/j.ijrobp.2009.04.069</a> |
| Yuh et al      | 2009 | Predicting control of primary tumor and survival by DCE MRI during early therapy in cervical cancer                                                                                                     | <a href="https://doi.org/10.1097/RLI.0b013e3181a64ce9">10.1097/RLI.0b013e3181a64ce9</a> |
| Mayr et al     | 2009 | Synergistic effects of hemoglobin and tumor perfusion on tumor control and survival in cervical cancer                                                                                                  | <a href="https://doi.org/10.1016/j.ijrobp.2008.09.050">10.1016/j.ijrobp.2008.09.050</a> |
| Mannelli et al | 2010 | Evaluation of nonenhancing tumor fraction assessed by dynamic contrast-enhanced MRI subtraction as a predictor of decrease in tumor volume in response to chemoradiotherapy in advanced cervical cancer | <a href="https://doi.org/10.2214/AJR.09.3437">10.2214/AJR.09.3437</a>                   |
| Mayr et al     | 2010 | Longitudinal changes in tumor perfusion pattern during the radiation therapy course and its clinical impact in cervical cancer                                                                          | <a href="https://doi.org/10.1016/j.ijrobp.2009.04.084">10.1016/j.ijrobp.2009.04.084</a> |
| Mayr et al     | 2010 | Ultra-early predictive assay for treatment failure using functional magnetic resonance imaging and clinical prognostic parameters in cervical cancer                                                    | <a href="https://doi.org/10.1002/cncr.24822">10.1002/cncr.24822</a>                     |
| Vargas et al   | 2011 | The value of MR imaging when the site of uterine cancer origin is uncertain                                                                                                                             | <a href="https://doi.org/10.1148/radiol.10101147">10.1148/radiol.10101147</a>           |
| Lin et al      | 2011 | Role of magnetic resonance imaging and apparent diffusion coefficient at 3T in distinguishing between adenocarcinoma of the uterine cervix and endometrium                                              |                                                                                         |
| Akita et al    | 2011 | Comparison of T2-weighted and contrast-enhanced T1-weighted MR imaging at 1.5 T for assessing the local extent of cervical carcinoma                                                                    | <a href="https://doi.org/10.1007/s00330-011-2122-6">10.1007/s00330-011-2122-6</a>       |
| Andersen et al | 2011 | Dynamic contrast-enhanced MRI of cervical cancers: temporal percentile screening of contrast enhancement identifies parameters for prediction of chemoradioresistance                                   | <a href="https://doi.org/10.1016/j.ijrobp.2011.05.050">10.1016/j.ijrobp.2011.05.050</a> |
| Huang et al    | 2012 | Characterizing at-Risk Voxels by Using Perfusion Magnetic Resonance Imaging for Cervical Cancer during Radiotherapy                                                                                     | <a href="https://doi.org/10.4172/1948-5956.1000151">10.4172/1948-5956.1000151</a>       |
| Mayr et al     | 2012 | Characterizing tumor heterogeneity with functional imaging and quantifying high-risk tumor volume for early prediction of treatment outcome: cervical cancer as a model                                 | <a href="https://doi.org/10.1016/j.ijrobp.2011.08.011">10.1016/j.ijrobp.2011.08.011</a> |
| Kim et al      | 2012 | Dynamic contrast-enhanced 3-T MR imaging in cervical cancer before and after concurrent chemoradiotherapy                                                                                               | <a href="https://doi.org/10.1007/s00330-012-2504-4">10.1007/s00330-012-2504-4</a>       |
| He et al       | 2013 | MRI is highly specific in determining primary cervical versus endometrial cancer when biopsy results are inconclusive                                                                                   | <a href="https://doi.org/10.1016/j.crad.2013.05.095">10.1016/j.crad.2013.05.095</a>     |
| Lin et al      | 2013 | Evaluation of international federation of gynecology and obstetrics stage IB cervical cancer: comparison of diffusion-weighted and dynamic contrast-enhanced magnetic resonance imaging at 3.0 T        | <a href="https://doi.org/10.1097/RCT.0b013e3182990a65">10.1097/RCT.0b013e3182990a65</a> |
| Andersen et al | 2013 | Pharmacokinetic parameters derived from dynamic contrast enhanced MRI of cervical cancers predict chemoradiotherapy outcome                                                                             | <a href="https://doi.org/10.1016/j.radonc.2012.11.007">10.1016/j.radonc.2012.11.007</a> |
| Hompland et al | 2014 | Peritumoral interstitial fluid flow velocity predicts survival in cervical carcinoma                                                                                                                    | <a href="https://doi.org/10.1016/j.radonc.2014.09.011">10.1016/j.radonc.2014.09.011</a> |
| Park et al     | 2014 | Assessment of early response to concurrent chemoradiotherapy in cervical cancer: value of diffusion-weighted and dynamic contrast-enhanced MR imaging                                                   | <a href="https://doi.org/10.1016/j.mri.2014.05.009">10.1016/j.mri.2014.05.009</a>       |
| Himoto et al   | 2014 | Assessment of the early predictive power of quantitative magnetic resonance imaging parameters during neoadjuvant chemotherapy for uterine cervical cancer                                              | <a href="https://doi.org/10.1097/IGC.0000000000000124">10.1097/IGC.0000000000000124</a> |
| Torheim et al  | 2014 | Classification of dynamic contrast enhanced MR images of cervical cancers using texture analysis and support vector machines                                                                            | <a href="https://doi.org/10.1109/TMI.2014.2321024">10.1109/TMI.2014.2321024</a>         |
| Kuang et al    | 2015 | Diagnostic accuracy of diffusion-weighted MRI for differentiation of cervical cancer and benign cervical lesions at 3.0T: Comparison with routine MRI and dynamic contrast-enhanced MRI                 | <a href="https://doi.org/10.1002/jmri.24894">10.1002/jmri.24894</a>                     |
| Yu et al       | 2015 | Comparison of contrast-enhanced isotropic 3D-GRE-T1WI sequence versus conventional non-isotropic sequence on preoperative staging of cervical cancer                                                    | <a href="https://doi.org/10.1371/journal.pone.0122053">10.1371/journal.pone.0122053</a> |

|                         |      |                                                                                                                                                                                                         |                                                                                                                                   |
|-------------------------|------|---------------------------------------------------------------------------------------------------------------------------------------------------------------------------------------------------------|-----------------------------------------------------------------------------------------------------------------------------------|
| Lucas et al             | 2015 | Added value of diffusion-weighted MRI in detection of cervical cancer recurrence: comparison with morphologic and dynamic contrast-enhanced MRI sequences                                               | <a href="https://doi.org/10.5152/dir.2015.14427">10.5152/dir.2015.14427</a>                                                       |
| Mahajan et al           | 2015 | Role of 3T multiparametric-MRI with BOLD hypoxia imaging for diagnosis and post therapy response evaluation of postoperative recurrent cervical cancers                                                 | <a href="https://doi.org/10.1016/j.ejro.2015.11.003">10.1016/j.ejro.2015.11.003</a>                                               |
| Lund et al              | 2015 | Short-term pretreatment DCE-MRI in prediction of outcome in locally advanced cervical cancer                                                                                                            | <a href="https://doi.org/10.1016/j.radonc.2015.05.001">10.1016/j.radonc.2015.05.001</a>                                           |
| Fridsten et al          | 2016 | Preoperative MR staging of cervical carcinoma: are oblique and contrast-enhanced sequences necessary?                                                                                                   | <a href="https://doi.org/10.1177/2058460116679460">10.1177/2058460116679460</a>                                                   |
| Torheim et al           | 2016 | Cluster analysis of dynamic contrast enhanced MRI reveals tumor subregions related to locoregional relapse for cervical cancer patients                                                                 | <a href="https://doi.org/10.1080/0284186X.2016.1189091">10.1080/0284186X.2016.1189091</a>                                         |
| Onal et al              | 2016 | Treatment response evaluation using the mean apparent diffusion coefficient in cervical cancer patients treated with definitive chemoradiotherapy                                                       | <a href="https://doi.org/10.1002/jmri.25215">10.1002/jmri.25215</a>                                                               |
| Jalaguier-Coudray et al | 2017 | Value of Dynamic Contrast-enhanced and Diffusion-weighted MR Imaging in the Detection of Pathologic Complete Response in Cervical Cancer after Neoadjuvant Therapy: A Retrospective Observational Study | <a href="https://doi.org/10.1148/radiol.2017161299">10.1148/radiol.2017161299</a>                                                 |
| Lund et al              | 2017 | Pretreatment late-phase DCE-MRI predicts outcome in locally advanced cervix cancer                                                                                                                      | <a href="https://doi.org/10.1080/0284186X.2017.1294762">10.1080/0284186X.2017.1294762</a>                                         |
| Dickie et al            | 2017 | The prognostic value of dynamic contrast-enhanced MRI contrast agent transfer constant K <sub>trans</sub> in cervical cancer is explained by plasma flow rather than vessel permeability                | <a href="https://doi.org/10.1038/bjc.2017.121">10.1038/bjc.2017.121</a>                                                           |
| Huang et al             | 2018 | Making the invisible visible: improving detectability of MRI-invisible residual cervical cancer after conisation by DCE-MRI                                                                             | <a href="https://doi.org/10.1016/j.crad.2018.10.013">10.1016/j.crad.2018.10.013</a>                                               |
| Simonsen et al          | 2018 | DCE-MRI-Derived Measures of Tumor Hypoxia and Interstitial Fluid Pressure Predict Outcomes in Cervical Carcinoma                                                                                        | <a href="https://doi.org/10.1016/j.ijrobp.2018.04.035">10.1016/j.ijrobp.2018.04.035</a>                                           |
| Zhang et al             | 2018 | Dynamic Contrast-Enhanced Magnetic Resonance Imaging of Advanced Cervical Carcinoma: The Advantage of Perfusion Parameters From the Peripheral Region in Predicting the Early Response to Radiotherapy  | <a href="https://doi.org/10.1097/IGC.0000000000001308">10.1097/IGC.0000000000001308</a>                                           |
| Yang et al              | 2018 | Multi-parametric MRI in cervical cancer: early prediction of response to concurrent chemoradiotherapy in combination with clinical prognostic factors                                                   | <a href="https://doi.org/10.1007/s00330-017-4989-3">10.1007/s00330-017-4989-3</a>                                                 |
| Bowen et al             | 2018 | Tumor radiomic heterogeneity: Multiparametric functional imaging to characterize variability and predict response following cervical cancer radiation therapy                                           | <a href="https://doi.org/10.1002/jmri.25874">10.1002/jmri.25874</a>                                                               |
| Bakai et al             | 2019 | Radiation research to determine local tumor invasion in patients with cervical cancer                                                                                                                   | <a href="https://doi.org/10.32471/exp-oncology.2312-8852.vol-41-no-1.12596">10.32471/exp-oncology.2312-8852.vol-41-no-1.12596</a> |
| Song et al              | 2019 | Value of diffusion-weighted and dynamic contrast-enhanced MR in predicting parametrial invasion in cervical stromal ring focally disrupted stage IB-IIA cervical cancers                                | <a href="https://doi.org/10.1007/s00261-019-02107-y">10.1007/s00261-019-02107-y</a>                                               |
| Feng et al              | 2019 | Combined dynamic DCE-MRI and diffusion-weighted imaging to evaluate the effect of neoadjuvant chemotherapy in cervical cancer                                                                           | <a href="https://doi.org/10.1177/0300891619886656">10.1177/0300891619886656</a>                                                   |
| Li et al                | 2019 | MR-Based Radiomics Nomogram of Cervical Cancer in Prediction of the Lymph-Vascular Space Invasion preoperatively                                                                                        | <a href="https://doi.org/10.1002/jmri.26531">10.1002/jmri.26531</a>                                                               |
| Lu et al                | 2019 | On the potential use of dynamic contrast-enhanced (DCE) MRI parameters as radiomic features of cervical cancer                                                                                          | <a href="https://doi.org/10.1002/mp.13821">10.1002/mp.13821</a>                                                                   |
| Kan et al               | 2019 | Radiomic signature as a predictive factor for lymph node metastasis in early-stage cervical cancer                                                                                                      | <a href="https://doi.org/10.1002/jmri.26209">10.1002/jmri.26209</a>                                                               |
| Wu et al                | 2019 | Radiomics Analysis of Multiparametric MRI Evaluates the Pathological Features of Cervical Squamous Cell Carcinoma                                                                                       | <a href="https://doi.org/10.1002/jmri.26301">10.1002/jmri.26301</a>                                                               |
| Lin et al               | 2020 | Differentiation of endometrial adenocarcinoma from adenocarcinoma of cervix using kinetic parameters derived from DCE-MRI                                                                               | <a href="https://doi.org/10.1016/j.ejrad.2020.109190">10.1016/j.ejrad.2020.109190</a>                                             |

|                 |      |                                                                                                                                                                                                                   |                                                                                         |
|-----------------|------|-------------------------------------------------------------------------------------------------------------------------------------------------------------------------------------------------------------------|-----------------------------------------------------------------------------------------|
| Li et al        | 2020 | Diagnosis of Cervical Cancer With Parametrial Invasion on Whole-Tumor Dynamic Contrast-Enhanced Magnetic Resonance Imaging Combined With Whole-Lesion Texture Analysis Based on T2- Weighted Images               | <a href="https://doi.org/10.3389/fbioe.2020.00590">10.3389/fbioe.2020.00590</a>         |
| Bai et al       | 2020 | Quantitative kinetic parameters of primary tumor can be used to predict pelvic lymph node metastasis in early-stage cervical cancer                                                                               | <a href="https://doi.org/10.1007/s00261-020-02762-6">10.1007/s00261-020-02762-6</a>     |
| Kim et al       | 2020 | Assessment of pelvic lymph node metastasis in FIGO IB and IIA cervical cancer using quantitative dynamic contrast-enhanced MRI parameters                                                                         | <a href="https://doi.org/10.5152/dir.2020.19365">10.5152/dir.2020.19365</a>             |
| Zhang et al     | 2020 | The Role of Multiparametric Magnetic Resonance Imaging in the Study of Primary Tumor and Pelvic Lymph Node Metastasis in Stage IB1-IIA1 Cervical Cancer                                                           | <a href="https://doi.org/10.1097/RCT.0000000000001084">10.1097/RCT.0000000000001084</a> |
| Liu et al       | 2020 | DCE-MRI Quantitative Parameters as Predictors of Treatment Response in Patients With Locally Advanced Cervical Squamous Cell Carcinoma Underwent CCRT                                                             | <a href="https://doi.org/10.3389/fonc.2020.585738">10.3389/fonc.2020.585738</a>         |
| Lund et al      | 2020 | DCE-MRI of locally-advanced carcinoma of the uterine cervix: Tofts analysis versus non-model-based analyses                                                                                                       | <a href="https://doi.org/10.1186/s13014-020-01526-2">10.1186/s13014-020-01526-2</a>     |
| Zheng et al     | 2020 | Prediction of early response to concurrent chemoradiotherapy in cervical cancer: Value of multi-parameter MRI combined with clinical prognostic factors                                                           | <a href="https://doi.org/10.1016/j.mri.2020.06.014">10.1016/j.mri.2020.06.014</a>       |
| Zhang et al     | 2020 | Combined dynamic contrast-enhanced magnetic resonance imaging and diffusion-weighted imaging to predict neoadjuvant chemotherapy effect in FIGO stage IB2-IIA2 cervical cancers                                   | <a href="https://doi.org/10.1007/s11547-020-01214-x">10.1007/s11547-020-01214-x</a>     |
| Fang et al      | 2020 | Association of MRI-derived radiomic biomarker with disease-free survival in patients with early-stage cervical cancer                                                                                             | <a href="https://doi.org/10.7150/thno.37429">10.7150/thno.37429</a>                     |
| Park et al      | 2020 | Magnetic resonance imaging features of tumor and lymph node to predict clinical outcome in node-positive cervical cancer: a retrospective analysis                                                                | <a href="https://doi.org/10.1186/s13014-020-01502-w">10.1186/s13014-020-01502-w</a>     |
| Wang et al      | 2020 | MRI texture features differentiate clinicopathological characteristics of cervical carcinoma                                                                                                                      | <a href="https://doi.org/10.1007/s00330-020-06913-7">10.1007/s00330-020-06913-7</a>     |
| Hou et al       | 2020 | Radiomics Analysis of Multiparametric MRI for the Preoperative Prediction of Lymph Node Metastasis in Cervical Cancer                                                                                             | <a href="https://doi.org/10.3389/fonc.2020.01393">10.3389/fonc.2020.01393</a>           |
| Matsumoto et al | 2021 | Diagnostic Accuracy of Magnetic Resonance Imaging for International Federation of Gynecology and Obstetrics 2018 IB to IIB Cervical Cancer Staging: Comparison Among Magnetic Resonance Sequences and Pathologies | <a href="https://doi.org/10.1097/RCT.0000000000001210">10.1097/RCT.0000000000001210</a> |
| Gaustad et al   | 2021 | Assessment of Hypoxic Tissue Fraction and Prediction of Survival in Cervical Carcinoma by Dynamic Contrast-Enhanced MRI                                                                                           | <a href="https://doi.org/10.3389/fonc.2021.668916">10.3389/fonc.2021.668916</a>         |
| Qin et al       | 2021 | Combined dynamic contrast enhanced MRI parameter with clinical factors predict the survival of concurrent chemo-radiotherapy in patients with 2018 FIGO IIICr stage cervical cancer                               | <a href="https://doi.org/10.1016/j.ejrad.2021.109787">10.1016/j.ejrad.2021.109787</a>   |
| Zhang et al     | 2021 | Added-value of dynamic contrast-enhanced MRI on prediction of tumor recurrence in locally advanced cervical cancer treated with chemoradiotherapy                                                                 | <a href="https://doi.org/10.1007/s00330-021-08279-w">10.1007/s00330-021-08279-w</a>     |
| Lu et al        | 2021 | The Role of Dynamic Contrast-Enhanced Magnetic Resonance Imaging in Predicting Treatment Response for Cervical Cancer Treated with Concurrent Chemoradiotherapy                                                   | <a href="https://doi.org/10.2147/CMAR.S314289">10.2147/CMAR.S314289</a>                 |
| Jiang et al     | 2021 | MRI Based Radiomics Approach With Deep Learning for Prediction of Vessel Invasion in Early-Stage Cervical Cancer                                                                                                  | <a href="https://doi.org/10.1109/TCBB.2019.2963867">10.1109/TCBB.2019.2963867</a>       |
| Bhardwaj et al  | 2022 | Added-Value of Diffusion-Weighted Imaging (DWI) and Dynamic Contrast-Enhanced (DCE-MRI) Magnetic Resonance Imaging in the Preoperative Assessment of Cervical Cancer                                              | <a href="https://doi.org/10.1007/s13224-021-01488-9">10.1007/s13224-021-01488-9</a>     |
| Bai et al       | 2022 | ADC and kinetic parameter of primary tumor: Surrogate imaging markers for fertility-sparing vaginal radical trachelectomy in patients with stage IB cervical cancer                                               | <a href="https://doi.org/10.1016/j.ejrad.2022.110467">10.1016/j.ejrad.2022.110467</a>   |
| Wang et al      | 2022 | Preliminary MRI Study of Extracellular Volume Fraction for Identification of Lymphovascular Space Invasion of Cervical Cancer                                                                                     | <a href="https://doi.org/10.1002/jmri.28423">10.1002/jmri.28423</a>                     |
| Hu et al        | 2022 | Added value of radiomics analysis in MRI invisible early-stage cervical cancers                                                                                                                                   | <a href="https://doi.org/10.1259/bjr.20210986">10.1259/bjr.20210986</a>                 |

|             |      |                                                                                                                                                                 |                                                                                     |
|-------------|------|-----------------------------------------------------------------------------------------------------------------------------------------------------------------|-------------------------------------------------------------------------------------|
| Zhao et al  | 2022 | Classifying early stages of cervical cancer with MRI-based radiomics                                                                                            | <a href="https://doi.org/10.1016/j.mri.2022.03.002">10.1016/j.mri.2022.03.002</a>   |
| Kim et al   | 2022 | Magnetic resonance imaging-based texture analysis for the prediction of postoperative clinical outcome in uterine cervical cancer                               | <a href="https://doi.org/10.1007/s00261-021-03288-1">10.1007/s00261-021-03288-1</a> |
| Jiang et al | 2022 | MRI radiomics combined with clinicopathologic features to predict disease-free survival in patients with early-stage cervical cancer                            | <a href="https://doi.org/10.1259/bjr.20211229">10.1259/bjr.20211229</a>             |
| Zhang et al | 2022 | MRI-based radiomics value for predicting the survival of patients with locally advanced cervical squamous cell cancer treated with concurrent chemoradiotherapy | <a href="https://doi.org/10.1186/s40644-022-00474-2">10.1186/s40644-022-00474-2</a> |
| Huang et al | 2022 | Multi-Parametric Magnetic Resonance Imaging-Based Radiomics Analysis of Cervical Cancer for Preoperative Prediction of Lymphovascular Space Invasion            | <a href="https://doi.org/10.3389/fonc.2021.663370">10.3389/fonc.2021.663370</a>     |
| Zhou et al  | 2022 | Multiparametric magnetic resonance imaging-derived radiomics for the prediction of disease-free survival in early-stage squamous cervical cancer                | <a href="https://doi.org/10.1007/s00330-021-08326-6">10.1007/s00330-021-08326-6</a> |
| Wang et al  | 2022 | Multiparametric MRI-based radiomics analysis: differentiation of subtypes of cervical cancer in the early stage                                                 | <a href="https://doi.org/10.1177/02841851211014188">10.1177/02841851211014188</a>   |

| Authors      | Date | Title                                                                                                                           | DOI                                                                                           |
|--------------|------|---------------------------------------------------------------------------------------------------------------------------------|-----------------------------------------------------------------------------------------------|
| Lakman et al | 2013 | Stage IB1 Cervical Cancer: Role of Preoperative MR Imaging in Selection of Patients for Fertility-Sparing Radical Trachelectomy | <a href="https://doi.org/10.1148/radiol.13121746">https://doi.org/10.1148/radiol.13121746</a> |
